# Supplementary material
Source: Springer Nature journal article supplement (http://www.springermedizin.de/resource/supplementary/12955_2009_585_MOESM2_ESM.pdf/9560762)

Beck's Depression Inventory Score

20  
15  
10  
5  
0

Exercisers  
Non-Exercisers

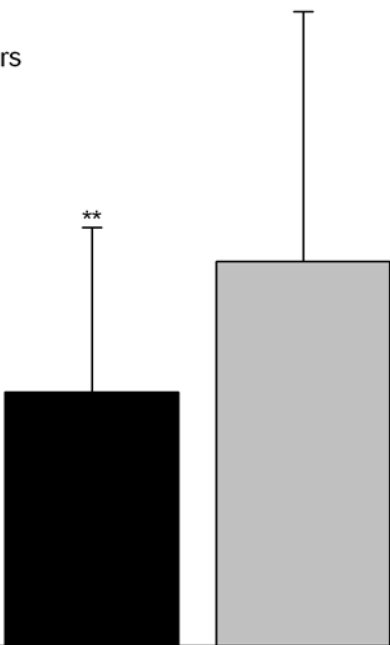

Supplement: MOESM2 [file 9560762]
